# Supplementary material
Source: PubMed Central journal article supplement (PMC10182520)
Supplement: ajtr0015-2498-f8.pdf [file ajtr0015-2498-f8.pdf]

## Biomarkers in Alzheimer's disease

**Table S1.** Differentially expressed genes in training cohorts ( $|\logFC| > 1$  and adjust  $P$ -value  $< 0.05$ )

| Genes   | logFC    | AveExpr  | t        | P.Value  | adj.P.Val | B        |
|---------|----------|----------|----------|----------|-----------|----------|
| RPS27   | 1.609555 | 9.360017 | 8.004628 | 7.82E-15 | 6.39E-13  | 22.93928 |
| SNRPG   | 1.560314 | 8.624294 | 8.761071 | 2.71E-17 | 4.33E-15  | 28.49838 |
| NDUFB3  | 1.525468 | 8.209974 | 9.3203   | 3.25E-19 | 7.97E-17  | 32.84635 |
| LSM3    | 1.518026 | 7.449509 | 9.399124 | 1.72E-19 | 5.26E-17  | 33.47474 |
| TXN     | 1.505974 | 9.029185 | 9.330874 | 2.99E-19 | 7.84E-17  | 32.93042 |
| RPS3A   | 1.488942 | 9.137976 | 5.789404 | 1.22E-08 | 2.88E-07  | 9.031426 |
| AIF1    | 1.482472 | 9.583373 | 10.57976 | 7.85E-24 | 6.36E-21  | 43.31744 |
| RPS27A  | 1.471432 | 11.22784 | 10.56869 | 8.65E-24 | 6.36E-21  | 43.22158 |
| ENY2    | 1.46671  | 7.751628 | 10.50344 | 1.53E-23 | 9.39E-21  | 42.65787 |
| HSPE1   | 1.442115 | 7.878766 | 10.48004 | 1.88E-23 | 9.87E-21  | 42.45623 |
| CMTM2   | 1.423501 | 9.803581 | 8.642466 | 6.76E-17 | 9.55E-15  | 27.60172 |
| CD3D    | 1.412729 | 9.713352 | 8.18586  | 2.08E-15 | 2.19E-13  | 24.23616 |
| FCER1A  | 1.374636 | 8.465744 | 6.248154 | 8.63E-10 | 2.64E-08  | 11.60099 |
| COX7A2  | 1.367872 | 9.666367 | 7.089347 | 4.40E-12 | 2.28E-10  | 16.74402 |
| RPL7    | 1.364625 | 7.449686 | 8.400067 | 4.24E-16 | 4.73E-14  | 25.79776 |
| NDUFB2  | 1.348251 | 9.117247 | 8.001095 | 8.03E-15 | 6.41E-13  | 22.91422 |
| PSMA4   | 1.345087 | 7.687818 | 8.417991 | 3.71E-16 | 4.27E-14  | 25.92982 |
| DBI     | 1.342793 | 7.573618 | 8.653271 | 6.22E-17 | 9.15E-15  | 27.68303 |
| RPL24   | 1.340774 | 11.10152 | 8.444713 | 3.03E-16 | 3.72E-14  | 26.12711 |
| TMC01   | 1.319965 | 8.386782 | 6.489204 | 2.01E-10 | 7.28E-09  | 13.01867 |
| EEF1B2  | 1.308908 | 8.298641 | 8.059392 | 5.26E-15 | 4.72E-13  | 23.32879 |
| DPM1    | 1.30758  | 7.926542 | 8.417659 | 3.72E-16 | 4.27E-14  | 25.92737 |
| RPL5    | 1.307361 | 9.893617 | 7.151992 | 2.91E-12 | 1.55E-10  | 17.14862 |
| UFC1    | 1.289101 | 8.789978 | 11.6999  | 3.04E-28 | 1.12E-24  | 53.33741 |
| PSMA6   | 1.27603  | 7.944563 | 6.722693 | 4.69E-11 | 2.04E-09  | 14.43524 |
| MRPL33  | 1.275817 | 9.322367 | 10.76414 | 1.54E-24 | 2.83E-21  | 44.92362 |
| TAX1BP1 | 1.275691 | 9.0186   | 6.564644 | 1.26E-10 | 4.78E-09  | 13.47173 |
| SNRPB2  | 1.274217 | 8.620786 | 9.411019 | 1.56E-19 | 5.21E-17  | 33.56989 |
| PSMA3   | 1.273224 | 7.272025 | 10.0806  | 5.90E-22 | 2.71E-19  | 39.06033 |
| COX6C   | 1.272149 | 9.396508 | 7.237844 | 1.64E-12 | 9.13E-11  | 17.70784 |
| SEC11A  | 1.268193 | 8.960055 | 8.296291 | 9.21E-16 | 9.96E-14  | 25.03737 |
| TPT1    | 1.260235 | 12.64568 | 4.951095 | 9.98E-07 | 1.37E-05  | 4.786157 |
| POLR3GL | 1.247474 | 8.724454 | 8.53491  | 1.53E-16 | 2.01E-14  | 26.7965  |
| DNAJC8  | 1.243341 | 9.662491 | 9.276359 | 4.64E-19 | 1.00E-16  | 32.49769 |
| COMMD3  | 1.24251  | 8.778826 | 6.71466  | 4.93E-11 | 2.08E-09  | 14.3858  |
| SLU7    | 1.238382 | 7.618838 | 8.062144 | 5.15E-15 | 4.72E-13  | 23.34842 |
| IGBP1   | 1.234193 | 8.058435 | 9.349145 | 2.58E-19 | 7.29E-17  | 33.07587 |
| HMGB2   | 1.233574 | 7.338737 | 6.721438 | 4.73E-11 | 2.04E-09  | 14.42751 |
| VPS29   | 1.230121 | 8.767872 | 6.389813 | 3.68E-10 | 1.25E-08  | 12.42857 |
| ANAPC13 | 1.229039 | 9.062079 | 8.075493 | 4.68E-15 | 4.41E-13  | 23.4437  |
| RPS4X   | 1.226629 | 11.42672 | 6.715426 | 4.91E-11 | 2.08E-09  | 14.39051 |
| SH2D1A  | 1.211206 | 7.805405 | 6.922    | 1.31E-11 | 6.26E-10  | 15.67762 |
| NGDN    | 1.207658 | 7.404584 | 8.963076 | 5.61E-18 | 1.09E-15  | 30.04633 |
| RPL12   | 1.206323 | 11.00729 | 7.574583 | 1.65E-13 | 1.21E-11  | 19.95344 |
| SSBP1   | 1.202602 | 8.844253 | 8.864241 | 1.22E-17 | 2.03E-15  | 29.28572 |
| S100P   | 1.201722 | 8.534098 | 3.066349 | 0.002279 | 0.011524  | -2.49927 |
| CLEC4A  | 1.199682 | 8.853891 | 6.010665 | 3.47E-09 | 9.59E-08  | 10.2495  |

## Biomarkers in Alzheimer's disease

|           |          |          |          |          |          |          |
|-----------|----------|----------|----------|----------|----------|----------|
| ACAT1     | 1.196367 | 7.5686   | 7.43027  | 4.46E-13 | 2.83E-11 | 18.98096 |
| SEC11C    | 1.191696 | 7.671402 | 7.301401 | 1.07E-12 | 6.05E-11 | 18.12534 |
| VBP1      | 1.189889 | 7.767461 | 5.933711 | 5.40E-09 | 1.42E-07 | 9.821328 |
| VPREB3    | 1.189533 | 7.766085 | 4.820647 | 1.88E-06 | 2.45E-05 | 4.179462 |
| MTIF3     | 1.189342 | 7.695863 | 8.904146 | 8.91E-18 | 1.64E-15 | 29.59207 |
| ZNHIT3    | 1.188955 | 7.537992 | 6.884199 | 1.67E-11 | 7.79E-10 | 15.43966 |
| SUB1      | 1.188161 | 7.189655 | 6.886199 | 1.65E-11 | 7.79E-10 | 15.45222 |
| BOLA2     | 1.186158 | 8.837085 | 6.038841 | 2.95E-09 | 8.28E-08 | 10.40747 |
| FRG1      | 1.18499  | 7.705225 | 8.009453 | 7.56E-15 | 6.31E-13 | 22.97352 |
| GNL2      | 1.184044 | 7.7993   | 9.305633 | 3.66E-19 | 8.42E-17 | 32.72984 |
| UCHL3     | 1.183686 | 7.269827 | 9.80055  | 6.27E-21 | 2.56E-18 | 36.73236 |
| LARP7     | 1.180143 | 7.184561 | 8.13943  | 2.93E-15 | 2.91E-13 | 23.90177 |
| MPHOSPH10 | 1.17912  | 7.854866 | 8.152241 | 2.67E-15 | 2.73E-13 | 23.99389 |
| FGL2      | 1.177594 | 11.29    | 5.278012 | 1.92E-07 | 3.37E-06 | 6.371032 |
| ZC3H15    | 1.173928 | 7.188201 | 7.556873 | 1.87E-13 | 1.34E-11 | 19.83329 |
| TMSB10    | 1.172418 | 12.6362  | 8.656653 | 6.06E-17 | 9.15E-15 | 27.70849 |
| POLE4     | 1.170632 | 9.105497 | 5.80595  | 1.11E-08 | 2.69E-07 | 9.121129 |
| EIF4A2    | 1.168289 | 10.43317 | 4.268268 | 2.34E-05 | 0.000225 | 1.775971 |
| TRAPPC4   | 1.165273 | 8.540057 | 8.864463 | 1.21E-17 | 2.03E-15 | 29.28741 |
| KLRF1     | 1.162783 | 7.794414 | 3.765954 | 0.000185 | 0.001395 | -0.17241 |
| GNL3      | 1.161637 | 7.27984  | 6.625284 | 8.65E-11 | 3.38E-09 | 13.83912 |
| SET       | 1.160755 | 9.058105 | 6.374144 | 4.05E-10 | 1.37E-08 | 12.33625 |
| MRPL36    | 1.160749 | 7.854119 | 7.424341 | 4.64E-13 | 2.89E-11 | 18.94133 |
| RPL26L1   | 1.160499 | 7.067921 | 7.410133 | 5.12E-13 | 3.13E-11 | 18.84646 |
| TRAT1     | 1.158254 | 7.308237 | 5.689111 | 2.13E-08 | 4.75E-07 | 8.492512 |
| ZBED5     | 1.156992 | 8.186188 | 4.486661 | 8.91E-06 | 9.95E-05 | 2.693956 |
| NDUFB6    | 1.156392 | 8.41702  | 7.350937 | 7.65E-13 | 4.61E-11 | 18.45279 |
| VAMP7     | 1.156114 | 8.100145 | 5.563607 | 4.23E-08 | 9.14E-07 | 7.829854 |
| SNRK      | 1.154602 | 9.019402 | 4.457393 | 1.02E-05 | 0.000111 | 2.568467 |
| PTRH2     | 1.154589 | 7.223705 | 7.544441 | 2.03E-13 | 1.41E-11 | 19.74908 |
| ZCCHC17   | 1.15268  | 7.743866 | 8.078528 | 4.57E-15 | 4.41E-13 | 23.46538 |
| DYNLT3    | 1.148081 | 7.147284 | 6.627953 | 8.50E-11 | 3.36E-09 | 13.85536 |
| MRPS17    | 1.147402 | 7.228969 | 10.60016 | 6.56E-24 | 6.36E-21 | 43.49432 |
| NUP88     | 1.146683 | 8.088509 | 6.642555 | 7.76E-11 | 3.17E-09 | 13.94428 |
| NAP1L1    | 1.145913 | 8.556691 | 4.568925 | 6.12E-06 | 7.12E-05 | 3.050733 |
| BTF3      | 1.144319 | 9.098358 | 7.319806 | 9.45E-13 | 5.51E-11 | 18.24679 |
| NDUFAF2   | 1.144043 | 7.201889 | 8.022276 | 6.89E-15 | 6.03E-13 | 23.06458 |
| SNURF     | 1.143706 | 8.549658 | 5.452381 | 7.68E-08 | 1.53E-06 | 7.253555 |
| CUTC      | 1.142512 | 7.552621 | 7.22285  | 1.81E-12 | 9.95E-11 | 17.60978 |
| SNRPF     | 1.14176  | 8.824739 | 5.126121 | 4.17E-07 | 6.54E-06 | 5.623288 |
| LYRM2     | 1.139303 | 7.546508 | 6.631655 | 8.31E-11 | 3.36E-09 | 13.87788 |
| CD79A     | 1.135425 | 7.862534 | 3.5857   | 0.000368 | 0.00249  | -0.8154  |
| TBC1D15   | 1.134592 | 7.623807 | 5.790084 | 1.22E-08 | 2.88E-07 | 9.035108 |
| ATG3      | 1.134195 | 7.976037 | 5.849834 | 8.69E-09 | 2.17E-07 | 9.36013  |
| PTPN4     | 1.134169 | 8.050844 | 4.605276 | 5.18E-06 | 6.20E-05 | 3.210292 |
| TCEAL8    | 1.132485 | 7.034816 | 8.534871 | 1.53E-16 | 2.01E-14 | 26.79621 |
| CD58      | 1.131889 | 7.699419 | 4.419536 | 1.20E-05 | 0.000129 | 2.407279 |
| RPL15     | 1.131746 | 10.51133 | 3.697884 | 0.00024  | 0.001721 | -0.41874 |
| AGTPBP1   | 1.130733 | 8.64499  | 5.246539 | 2.26E-07 | 3.86E-06 | 6.214478 |

## Biomarkers in Alzheimer's disease

|          |          |          |          |          |          |          |
|----------|----------|----------|----------|----------|----------|----------|
| TAF12    | 1.1285   | 7.811007 | 7.796496 | 3.48E-14 | 2.66E-12 | 21.47794 |
| HLA-DOB  | 1.126125 | 7.86112  | 4.136751 | 4.11E-05 | 0.000372 | 1.243759 |
| HMG1N1   | 1.125817 | 8.84021  | 5.26283  | 2.08E-07 | 3.62E-06 | 6.295406 |
| PLAC8    | 1.121874 | 9.908433 | 4.613638 | 4.98E-06 | 5.99E-05 | 3.247165 |
| SPAG7    | 1.121814 | 7.449676 | 7.317478 | 9.60E-13 | 5.51E-11 | 18.23142 |
| PPP1R2   | 1.12169  | 8.009864 | 4.642495 | 4.36E-06 | 5.29E-05 | 3.374868 |
| BTBD10   | 1.120736 | 7.515313 | 7.107501 | 3.90E-12 | 2.05E-10 | 16.86097 |
| CCT8     | 1.120637 | 9.397083 | 5.537508 | 4.87E-08 | 1.04E-06 | 7.693697 |
| COMMD1   | 1.116948 | 8.456085 | 7.040907 | 6.05E-12 | 3.00E-10 | 16.43318 |
| ZNF22    | 1.116835 | 7.533323 | 4.277447 | 2.25E-05 | 0.000219 | 1.813695 |
| LYPLAL1  | 1.116631 | 7.465392 | 6.70958  | 5.09E-11 | 2.13E-09 | 14.35456 |
| SDAD1    | 1.115534 | 8.990701 | 5.392528 | 1.05E-07 | 2.00E-06 | 6.947732 |
| MTIF2    | 1.115318 | 7.553229 | 7.551995 | 1.93E-13 | 1.36E-11 | 19.80023 |
| SLC30A9  | 1.113518 | 7.482694 | 5.394483 | 1.04E-07 | 2.00E-06 | 6.957674 |
| SYF2     | 1.112482 | 7.847031 | 4.554967 | 6.53E-06 | 7.52E-05 | 2.989777 |
| RPL34    | 1.11233  | 6.832642 | 7.5304   | 2.24E-13 | 1.53E-11 | 19.65411 |
| PPP1CC   | 1.111531 | 9.496883 | 3.643695 | 0.000296 | 0.002066 | -0.61179 |
| MRPS28   | 1.110568 | 6.91372  | 7.489131 | 2.98E-13 | 1.95E-11 | 19.37579 |
| RABEP1   | 1.109975 | 7.866664 | 4.174793 | 3.49E-05 | 0.000322 | 1.396103 |
| WBP4     | 1.108676 | 7.171659 | 5.945118 | 5.06E-09 | 1.34E-07 | 9.884495 |
| PDCD10   | 1.108059 | 7.25675  | 4.273146 | 2.29E-05 | 0.000222 | 1.79601  |
| CFDP1    | 1.107623 | 7.312833 | 7.344341 | 8.00E-13 | 4.74E-11 | 18.40909 |
| BTLA     | 1.107028 | 7.065203 | 5.772089 | 1.34E-08 | 3.15E-07 | 8.93779  |
| NFU1     | 1.106481 | 7.336419 | 6.318371 | 5.67E-10 | 1.85E-08 | 12.00921 |
| RPS21    | 1.105676 | 7.44293  | 4.736828 | 2.80E-06 | 3.55E-05 | 3.797446 |
| RGS18    | 1.105546 | 9.012759 | 2.129215 | 0.033704 | 0.108111 | -4.89122 |
| CD160    | 1.104222 | 7.316553 | 4.049876 | 5.90E-05 | 0.000518 | 0.900752 |
| PRMT1    | 1.103759 | 8.093079 | 6.290136 | 6.72E-10 | 2.13E-08 | 11.84459 |
| LTV1     | 1.103603 | 7.513847 | 6.780627 | 3.25E-11 | 1.47E-09 | 14.79324 |
| BCCIP    | 1.103004 | 7.281884 | 5.994611 | 3.81E-09 | 1.01E-07 | 10.15977 |
| CLK1     | 1.101738 | 7.987373 | 3.06231  | 0.00231  | 0.011634 | -2.51137 |
| ARPC2    | 1.101513 | 12.05039 | 5.697407 | 2.03E-08 | 4.59E-07 | 8.536773 |
| USP1     | 1.101417 | 7.262528 | 4.349162 | 1.64E-05 | 0.000168 | 2.111035 |
| NDUFA9   | 1.100453 | 7.974848 | 6.299781 | 6.34E-10 | 2.03E-08 | 11.90076 |
| MRFAP1L1 | 1.100101 | 7.745686 | 4.571153 | 6.06E-06 | 7.08E-05 | 3.060478 |
| CLN3     | -1.10002 | 7.767752 | -5.92669 | 5.62E-09 | 1.47E-07 | 9.782523 |
| TBC1D3B  | -1.10012 | 7.34544  | -5.87844 | 7.39E-09 | 1.89E-07 | 9.516801 |
| ACSL1    | -1.10017 | 9.274877 | -2.23205 | 0.026036 | 0.087244 | -4.66997 |
| S100A10  | -1.10052 | 11.6047  | -3.60725 | 0.000339 | 0.002318 | -0.7401  |
| JAK1     | -1.10083 | 9.0193   | -3.16823 | 0.001624 | 0.008738 | -2.18885 |
| ADAM15   | -1.10124 | 8.334721 | -4.22926 | 2.77E-05 | 0.000261 | 1.616476 |
| DUSP18   | -1.10134 | 8.860939 | -4.5835  | 5.73E-06 | 6.79E-05 | 3.114588 |
| PUM1     | -1.10155 | 9.615751 | -4.82956 | 1.80E-06 | 2.36E-05 | 4.220467 |
| NINJ1    | -1.1018  | 10.89604 | -3.1977  | 0.001469 | 0.008002 | -2.09725 |
| NKG7     | -1.10223 | 12.03308 | -2.36091 | 0.018597 | 0.066113 | -4.37826 |
| SLC16A5  | -1.10227 | 7.820328 | -4.95594 | 9.74E-07 | 1.35E-05 | 4.808981 |
| RHBDD2   | -1.10232 | 9.357268 | -4.4807  | 9.15E-06 | 0.000102 | 2.668354 |
| SLC11A1  | -1.10322 | 8.70159  | -3.57067 | 0.000389 | 0.002614 | -0.86767 |
| IGFBP7   | -1.10322 | 7.62935  | -4.74774 | 2.66E-06 | 3.38E-05 | 3.846841 |

## Biomarkers in Alzheimer's disease

|          |          |          |          |          |          |          |
|----------|----------|----------|----------|----------|----------|----------|
| PIAS4    | -1.10328 | 9.048995 | -4.93074 | 1.10E-06 | 1.50E-05 | 4.690526 |
| HIP1     | -1.10352 | 7.398625 | -3.66296 | 0.000275 | 0.001931 | -0.54346 |
| YIPF6    | -1.10378 | 8.802682 | -4.49781 | 8.47E-06 | 9.55E-05 | 2.741962 |
| SIGLEC5  | -1.104   | 7.699953 | -3.37482 | 0.000794 | 0.004822 | -1.52951 |
| WWC3     | -1.10431 | 8.062959 | -5.16029 | 3.51E-07 | 5.76E-06 | 5.789793 |
| TST      | -1.10446 | 9.516769 | -3.75656 | 0.000192 | 0.001435 | -0.20668 |
| OSBPL5   | -1.10474 | 7.821929 | -4.25601 | 2.47E-05 | 0.000236 | 1.725716 |
| KIAA0513 | -1.10541 | 8.734343 | -3.99801 | 7.31E-05 | 0.000622 | 0.699215 |
| CNNM3    | -1.10546 | 7.572529 | -5.49771 | 6.03E-08 | 1.25E-06 | 7.487175 |
| GATAD2B  | -1.1057  | 8.130054 | -5.13473 | 4.00E-07 | 6.41E-06 | 5.66514  |
| ADAR     | -1.10595 | 10.12459 | -3.54899 | 0.000422 | 0.002793 | -0.94269 |
| CHFR     | -1.10679 | 9.43106  | -6.51774 | 1.68E-10 | 6.32E-09 | 13.18953 |
| ZAP70    | -1.10717 | 8.671486 | -4.01221 | 6.89E-05 | 0.000594 | 0.754179 |
| TSPAN32  | -1.10725 | 8.688197 | -4.9849  | 8.45E-07 | 1.19E-05 | 4.945777 |
| SYT11    | -1.10737 | 8.848883 | -4.25068 | 2.52E-05 | 0.00024  | 1.703903 |
| IER3     | -1.10768 | 7.744146 | -4.91147 | 1.21E-06 | 1.63E-05 | 4.600326 |
| CEP350   | -1.1088  | 8.390328 | -6.43685 | 2.77E-10 | 9.69E-09 | 12.70685 |
| PLCG2    | -1.1092  | 9.852003 | -3.99613 | 7.37E-05 | 0.000625 | 0.691989 |
| IFNGR2   | -1.11019 | 11.30619 | -4.098   | 4.83E-05 | 0.000431 | 1.089898 |
| TMEM154  | -1.11123 | 10.23983 | -2.54028 | 0.011365 | 0.044023 | -3.9456  |
| NT5C2    | -1.11126 | 9.282328 | -4.33735 | 1.73E-05 | 0.000176 | 2.061762 |
| SPSB3    | -1.11127 | 9.693225 | -4.94708 | 1.02E-06 | 1.40E-05 | 4.76727  |
| CTSW     | -1.11138 | 8.613774 | -3.19809 | 0.001467 | 0.008002 | -2.09604 |
| ATP6V1F  | -1.11202 | 10.32295 | -5.12589 | 4.18E-07 | 6.54E-06 | 5.622147 |
| AKT1     | -1.11208 | 10.03643 | -5.01411 | 7.31E-07 | 1.06E-05 | 5.084526 |
| SLC22A4  | -1.11216 | 7.819931 | -3.97878 | 7.91E-05 | 0.000665 | 0.625151 |
| E4F1     | -1.1127  | 8.505191 | -6.25489 | 8.29E-10 | 2.56E-08 | 11.64    |
| ZNF746   | -1.11306 | 9.233585 | -4.41972 | 1.20E-05 | 0.000129 | 2.40805  |
| NISCH    | -1.11355 | 8.497056 | -6.26327 | 7.89E-10 | 2.46E-08 | 11.68852 |
| RBCK1    | -1.1136  | 8.314714 | -5.22366 | 2.54E-07 | 4.30E-06 | 6.101184 |
| PSTPIP1  | -1.11369 | 8.534335 | -5.32501 | 1.50E-07 | 2.71E-06 | 6.606381 |
| KIR3DL1  | -1.11373 | 7.80358  | -3.43652 | 0.000636 | 0.003964 | -1.32483 |
| NFKBIZ   | -1.11378 | 9.466229 | -4.08126 | 5.18E-05 | 0.000458 | 1.023871 |
| MGAT1    | -1.1142  | 9.938249 | -5.30701 | 1.65E-07 | 2.94E-06 | 6.516016 |
| GDPD3    | -1.11422 | 7.550261 | -6.07218 | 2.43E-09 | 6.87E-08 | 10.59522 |
| PNPLA6   | -1.11482 | 9.193207 | -5.12637 | 4.17E-07 | 6.54E-06 | 5.624499 |
| AKAP13   | -1.11497 | 8.456562 | -6.2278  | 9.74E-10 | 2.93E-08 | 11.4834  |
| SLC26A8  | -1.11525 | 7.19938  | -5.00279 | 7.73E-07 | 1.11E-05 | 5.030684 |
| ANKS1A   | -1.11575 | 7.871144 | -7.50219 | 2.72E-13 | 1.82E-11 | 19.46376 |
| UBR4     | -1.11628 | 8.897887 | -5.16306 | 3.46E-07 | 5.73E-06 | 5.803303 |
| PPP1R14B | -1.11665 | 8.347555 | -7.20978 | 1.98E-12 | 1.07E-10 | 17.52444 |
| TRIM38   | -1.11799 | 8.946014 | -5.25446 | 2.17E-07 | 3.76E-06 | 6.253794 |
| SPI1     | -1.11803 | 10.21408 | -3.33    | 0.00093  | 0.005504 | -1.67592 |
| RAB24    | -1.11832 | 7.765331 | -6.31773 | 5.69E-10 | 1.85E-08 | 12.0055  |
| SLC27A3  | -1.1187  | 8.59676  | -5.4655  | 7.16E-08 | 1.44E-06 | 7.320988 |
| STAT5B   | -1.11871 | 8.834655 | -5.38548 | 1.09E-07 | 2.05E-06 | 6.911907 |
| TNFRSF1A | -1.11975 | 10.59215 | -4.37724 | 1.45E-05 | 0.000152 | 2.228716 |
| TRPC4AP  | -1.12011 | 9.039122 | -5.01913 | 7.13E-07 | 1.04E-05 | 5.108408 |
| PISD     | -1.1212  | 8.973175 | -4.50975 | 8.02E-06 | 9.13E-05 | 2.793476 |

## Biomarkers in Alzheimer's disease

|          |          |          |          |          |          |          |
|----------|----------|----------|----------|----------|----------|----------|
| TNFSF13B | -1.12137 | 10.32359 | -3.78362 | 0.000172 | 0.001313 | -0.1078  |
| CTNNA1   | -1.12212 | 9.058431 | -4.83048 | 1.79E-06 | 2.35E-05 | 4.224664 |
| IDS      | -1.12244 | 8.948136 | -5.67116 | 2.35E-08 | 5.21E-07 | 8.396951 |
| SLC9A8   | -1.12261 | 7.814915 | -6.08298 | 2.28E-09 | 6.51E-08 | 10.6562  |
| ZC3H3    | -1.12305 | 8.417697 | -6.09685 | 2.11E-09 | 6.09E-08 | 10.73471 |
| KLF6     | -1.12327 | 8.515199 | -5.75912 | 1.45E-08 | 3.36E-07 | 8.867834 |
| STAT3    | -1.12348 | 9.236638 | -4.11882 | 4.43E-05 | 0.000397 | 1.172399 |
| B4GALT5  | -1.12378 | 9.570983 | -3.76106 | 0.000188 | 0.001419 | -0.19026 |
| CREBBP   | -1.12418 | 9.131086 | -4.63759 | 4.46E-06 | 5.39E-05 | 3.35313  |
| TNFRSF14 | -1.12494 | 10.963   | -6.27253 | 7.46E-10 | 2.34E-08 | 11.74229 |
| PPTC7    | -1.12519 | 8.792531 | -6.00353 | 3.62E-09 | 9.71E-08 | 10.20959 |
| BCKDK    | -1.12746 | 9.185912 | -5.46243 | 7.28E-08 | 1.45E-06 | 7.30519  |
| NCSTN    | -1.12991 | 9.644502 | -5.07555 | 5.38E-07 | 8.11E-06 | 5.3787   |
| KLF2     | -1.13077 | 12.49163 | -5.46534 | 7.17E-08 | 1.44E-06 | 7.320148 |
| EMILIN2  | -1.13123 | 8.785816 | -5.13854 | 3.92E-07 | 6.35E-06 | 5.683661 |
| MAPK8IP3 | -1.1313  | 8.707327 | -6.75584 | 3.80E-11 | 1.70E-09 | 14.63974 |
| HBQ1     | -1.13162 | 10.26462 | -2.29827 | 0.021941 | 0.075848 | -4.52206 |
| GAK      | -1.13179 | 9.788639 | -5.48058 | 6.61E-08 | 1.36E-06 | 7.398673 |
| PGS1     | -1.13396 | 9.113736 | -5.47493 | 6.81E-08 | 1.39E-06 | 7.369535 |
| SLC7A7   | -1.13443 | 10.39408 | -5.26299 | 2.07E-07 | 3.62E-06 | 6.296205 |
| STAT1    | -1.13457 | 9.402702 | -3.57413 | 0.000384 | 0.002585 | -0.85565 |
| MKNK2    | -1.13559 | 9.475694 | -4.92667 | 1.12E-06 | 1.52E-05 | 4.671436 |
| FCGRT    | -1.1357  | 10.75588 | -5.16873 | 3.36E-07 | 5.59E-06 | 5.831082 |
| FRAT1    | -1.13618 | 7.940727 | -5.39263 | 1.05E-07 | 2.00E-06 | 6.948265 |
| AGTRAP   | -1.13664 | 8.520648 | -6.3319  | 5.23E-10 | 1.73E-08 | 12.0883  |
| NOL12    | -1.137   | 7.944724 | -8.01711 | 7.15E-15 | 6.11E-13 | 23.02788 |
| KLHDC8B  | -1.13802 | 7.697377 | -4.99393 | 8.08E-07 | 1.15E-05 | 4.988618 |
| MEGF9    | -1.13833 | 7.964413 | -5.75611 | 1.47E-08 | 3.38E-07 | 8.851622 |
| HSPA6    | -1.13856 | 9.246179 | -4.16615 | 3.63E-05 | 0.000332 | 1.361375 |
| RXRA     | -1.14058 | 10.79991 | -5.04347 | 6.32E-07 | 9.29E-06 | 5.224698 |
| ALPL     | -1.14151 | 10.85446 | -2.53757 | 0.011452 | 0.044314 | -3.95237 |
| HELZ     | -1.14229 | 8.122759 | -9.04475 | 2.95E-18 | 6.02E-16 | 30.67949 |
| ARHGEF2  | -1.14303 | 11.04351 | -7.04596 | 5.85E-12 | 2.95E-10 | 16.46554 |
| EIF2AK2  | -1.14442 | 9.050618 | -3.70077 | 0.000238 | 0.001717 | -0.4084  |
| APBB3    | -1.14472 | 8.112898 | -7.48108 | 3.15E-13 | 2.03E-11 | 19.32161 |
| PIK3CD   | -1.14619 | 9.466606 | -5.36662 | 1.21E-07 | 2.24E-06 | 6.816288 |
| NXF1     | -1.15088 | 9.277887 | -7.91847 | 1.46E-14 | 1.14E-12 | 22.33068 |
| CSF1R    | -1.15111 | 10.10815 | -4.46709 | 9.73E-06 | 0.000107 | 2.609944 |
| ZNF281   | -1.15415 | 8.601829 | -5.02938 | 6.78E-07 | 9.89E-06 | 5.157305 |
| CA4      | -1.15434 | 8.585433 | -3.72413 | 0.000217 | 0.00159  | -0.32425 |
| SMAP2    | -1.15472 | 12.43063 | -4.88769 | 1.36E-06 | 1.81E-05 | 4.489434 |
| DCUN1D1  | -1.15771 | 7.871169 | -5.79905 | 1.16E-08 | 2.76E-07 | 9.083691 |
| EFHD2    | -1.15826 | 11.92824 | -6.73603 | 4.31E-11 | 1.91E-09 | 14.51744 |
| FPR2     | -1.15936 | 8.952108 | -3.78242 | 0.000173 | 0.001316 | -0.1122  |
| TBXAS1   | -1.16107 | 9.847507 | -6.08574 | 2.25E-09 | 6.45E-08 | 10.67185 |
| ITGA5    | -1.1626  | 8.763511 | -5.88828 | 6.99E-09 | 1.80E-07 | 9.570841 |
| MYO1G    | -1.16508 | 9.949531 | -6.41311 | 3.20E-10 | 1.11E-08 | 12.56618 |
| ITGB2    | -1.16527 | 13.21236 | -6.40996 | 3.26E-10 | 1.12E-08 | 12.54757 |
| PLOD1    | -1.16601 | 8.902714 | -6.23176 | 9.51E-10 | 2.89E-08 | 11.50626 |

## Biomarkers in Alzheimer's disease

|         |          |          |          |          |          |          |
|---------|----------|----------|----------|----------|----------|----------|
| FOXO3   | -1.16664 | 10.06672 | -4.64507 | 4.31E-06 | 5.26E-05 | 3.386318 |
| ACADVL  | -1.168   | 9.851089 | -7.7459  | 4.97E-14 | 3.73E-12 | 21.12727 |
| PPM1F   | -1.16989 | 10.37548 | -5.34873 | 1.33E-07 | 2.43E-06 | 6.725851 |
| SLC15A4 | -1.17323 | 9.615326 | -6.20753 | 1.10E-09 | 3.28E-08 | 11.36663 |
| TLN1    | -1.1741  | 9.189393 | -5.10243 | 4.70E-07 | 7.17E-06 | 5.508425 |
| BEST1   | -1.17693 | 8.18837  | -6.19241 | 1.20E-09 | 3.53E-08 | 11.27969 |
| RHBDF2  | -1.17751 | 9.006029 | -6.87514 | 1.77E-11 | 8.15E-10 | 15.38281 |
| CEBPB   | -1.18182 | 12.08324 | -5.84151 | 9.11E-09 | 2.25E-07 | 9.314671 |
| SRRM2   | -1.18189 | 10.02406 | -6.57623 | 1.17E-10 | 4.49E-09 | 13.5417  |
| CSAD    | -1.18473 | 8.247861 | -6.99147 | 8.35E-12 | 4.04E-10 | 16.11772 |
| ULK1    | -1.1859  | 10.03443 | -6.4738  | 2.21E-10 | 7.80E-09 | 12.92668 |
| FPR1    | -1.1872  | 12.42206 | -5.11369 | 4.44E-07 | 6.83E-06 | 5.562954 |
| OSCAR   | -1.19048 | 9.26419  | -6.47432 | 2.20E-10 | 7.80E-09 | 12.92983 |
| APBB1IP | -1.19128 | 10.68937 | -6.0041  | 3.61E-09 | 9.71E-08 | 10.2128  |
| RNF24   | -1.19134 | 9.954112 | -4.84265 | 1.69E-06 | 2.23E-05 | 4.280765 |
| FES     | -1.19348 | 8.875001 | -6.99583 | 8.12E-12 | 3.98E-10 | 16.14549 |
| LPP     | -1.19569 | 9.726372 | -9.57503 | 4.08E-20 | 1.50E-17 | 34.8905  |
| MYADM   | -1.20489 | 11.64442 | -4.99868 | 7.89E-07 | 1.12E-05 | 5.011149 |
| GRN     | -1.21056 | 9.844343 | -5.82237 | 1.01E-08 | 2.49E-07 | 9.210354 |
| SORL1   | -1.21059 | 10.85277 | -5.2221  | 2.56E-07 | 4.32E-06 | 6.093503 |
| ABTB1   | -1.2221  | 10.46012 | -6.62955 | 8.42E-11 | 3.36E-09 | 13.8651  |
| PGLYRP1 | -1.22315 | 9.569679 | -4.26985 | 2.32E-05 | 0.000224 | 1.782453 |
| CSNK1G2 | -1.22986 | 10.26575 | -5.73617 | 1.64E-08 | 3.74E-07 | 8.744359 |
| ITGAM   | -1.26164 | 9.471993 | -8.47597 | 2.40E-16 | 3.04E-14 | 26.35848 |

**Table S2.** Feature genes identified by Boruta algorithm

| Gene    | Important | decision  |
|---------|-----------|-----------|
| VPS29   | 1.099922  | Rejected  |
| RPS3A   | 1.205005  | Rejected  |
| GRN     | 1.576741  | Rejected  |
| SORL1   | 1.706963  | Rejected  |
| MYADM   | 2.126641  | Rejected  |
| TAX1BP1 | 2.147483  | Rejected  |
| PSMA6   | 2.148816  | Rejected  |
| FCER1A  | 2.179526  | Rejected  |
| SH2D1A  | 2.318225  | Rejected  |
| PGLYRP1 | 2.546298  | Rejected  |
| EEF1B2  | 2.588323  | Rejected  |
| COX6C   | 2.808093  | Tentative |
| COMMD3  | 2.935152  | Tentative |
| CD3D    | 2.975145  | Confirmed |
| TPT1    | 3.01185   | Confirmed |
| NDUFB2  | 3.369418  | Confirmed |
| RPS27   | 3.397104  | Confirmed |
| COX7A2  | 3.459972  | Confirmed |
| TMCO1   | 3.467814  | Confirmed |
| ABTB1   | 3.490556  | Confirmed |
| CSNK1G2 | 3.527216  | Confirmed |

## Biomarkers in Alzheimer's disease

|         |          |           |
|---------|----------|-----------|
| POLR3GL | 3.807013 | Confirmed |
| SEC11A  | 3.928164 | Confirmed |
| SLU7    | 4.142269 | Confirmed |
| HMGB2   | 4.597455 | Confirmed |
| DPM1    | 4.789581 | Confirmed |
| RPL24   | 4.80265  | Confirmed |
| SNRPG   | 5.258554 | Confirmed |
| RPL12   | 5.447277 | Confirmed |
| RPL5    | 5.554934 | Confirmed |
| RPS4X   | 5.565047 | Confirmed |
| NGDN    | 5.639681 | Confirmed |
| ANAPC13 | 5.906456 | Confirmed |
| PSMA4   | 5.97657  | Confirmed |
| SNRPB2  | 6.095489 | Confirmed |
| RPL7    | 6.140573 | Confirmed |
| DBI     | 6.630868 | Confirmed |
| DNAJC8  | 7.058027 | Confirmed |
| PSMA3   | 7.641101 | Confirmed |
| IGBP1   | 8.153762 | Confirmed |
| SSBP1   | 8.222691 | Confirmed |
| ITGAM   | 8.553201 | Confirmed |
| HSPE1   | 8.776746 | Confirmed |
| TXN     | 8.798499 | Confirmed |
| LSM3    | 8.901268 | Confirmed |
| NDUFB3  | 9.049477 | Confirmed |
| ENY2    | 10.15341 | Confirmed |
| CMTM2   | 10.84303 | Confirmed |
| MRPL33  | 11.0729  | Confirmed |
| AIF1    | 11.28228 | Confirmed |
| RPS27A  | 13.19591 | Confirmed |
| UFC1    | 13.50049 | Confirmed |

---

## Biomarkers in Alzheimer's disease

**Table S3.** Hub genes identified by LASSO algorithm

---

|         |
|---------|
| AIF1    |
| RPS27A  |
| CMTM2   |
| COX7A2  |
| NDUFB2  |
| RPL24   |
| TMC01   |
| DPM1    |
| RPL5    |
| UFC1    |
| MRPL33  |
| SNRPB2  |
| PSMA3   |
| DNAJC8  |
| IGBP1   |
| ANAPC13 |
| RPS4X   |
| SSBP1   |
| ABTB1   |
| CSNK1G2 |
| ITGAM   |

---

**Table S4.** Gene model constructed by lightGBM

---

| Gene    | Coefficient |
|---------|-------------|
| AIF1    | 0.653944    |
| RPS27A  | 0.863563    |
| CMTM2   | 1.284774    |
| COX7A2  | -0.40885    |
| NDUFB2  | -0.44523    |
| RPL24   | -0.66977    |
| TMC01   | -1.23248    |
| DPM1    | -0.42652    |
| RPL5    | 0.053078    |
| UFC1    | 1.409454    |
| MRPL33  | 0.02332     |
| SNRPB2  | 0.338794    |
| PSMA3   | 0.621297    |
| DNAJC8  | 1.316004    |
| IGBP1   | 0.144825    |
| ANAPC13 | 0.269325    |
| RPS4X   | 0.36695     |
| SSBP1   | 0.263203    |
| ABTB1   | -0.91195    |
| CSNK1G2 | -0.64088    |
| ITGAM   | -0.53259    |

---



## Biomarkers in Alzheimer's disease

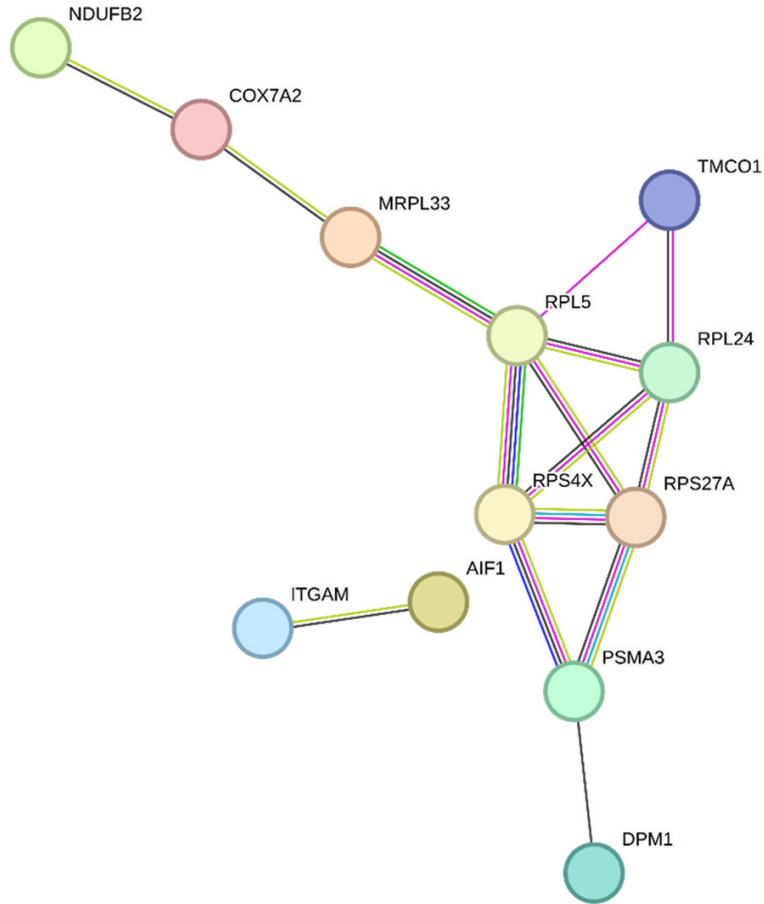

**Figure S1.** Protein-protein interaction network based on genes obtained from gene module constructed by lightGBM algorithm.

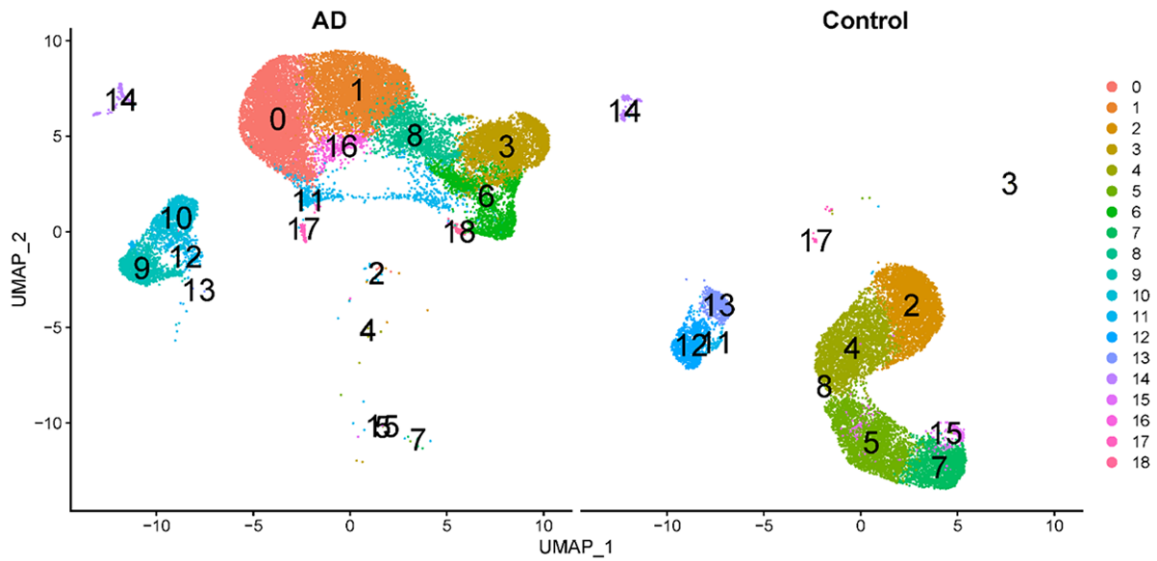

**Figure S2.** Nineteen clusters identified by using the uniform manifold approximation and projection for dimension reduction (UMAP) algorithm in blood single-cell RNA-seq collected from patients with Alzheimer's disease.
